# Supplementary material
Source: PubMed Central journal article supplement (PMC4077948)
Supplement: NIHMS572834-supplement-Supplementary_Material.pdf [file NIHMS572834-supplement-Supplementary_Material.pdf]

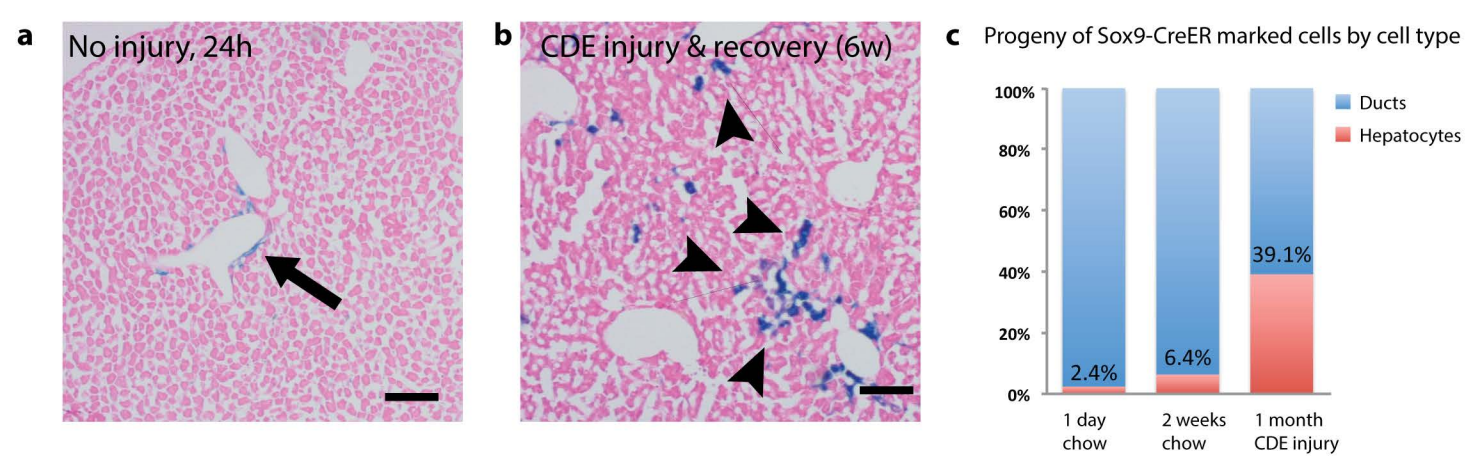

**d** 250mg/kg Tamoxifen in Sox9-CreER R26R-Confetti, 2 weeks homeostasis

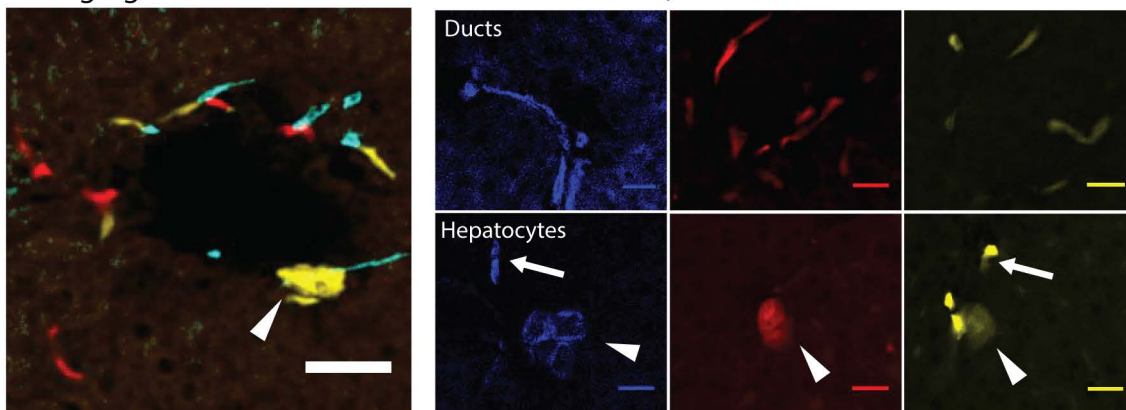

**e** 250mg/kg Tamoxifen + CDE

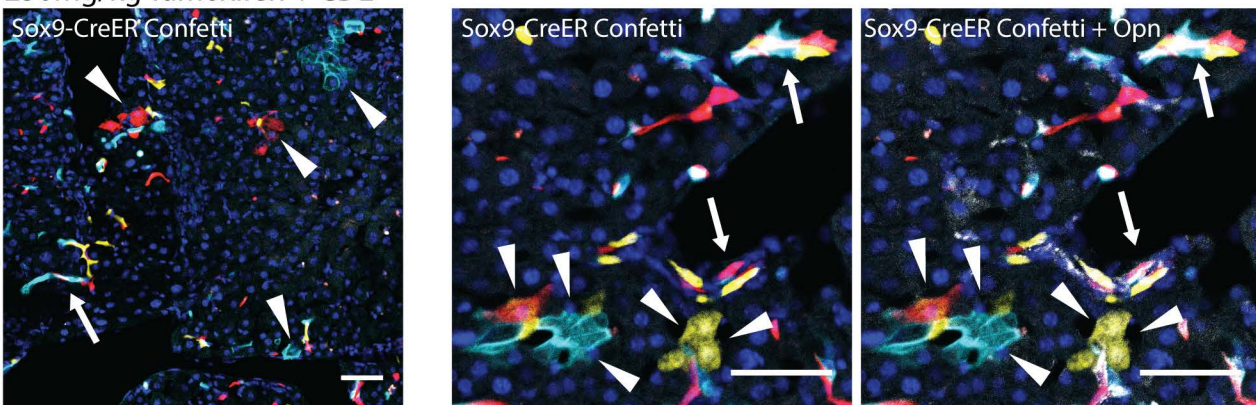

**f** 125mg/kg Tamoxifen + chronic CCl4

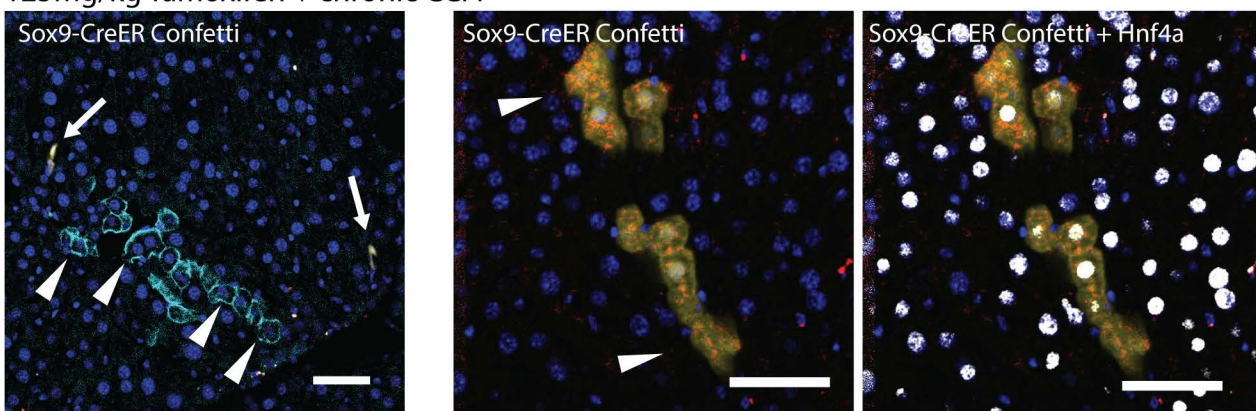

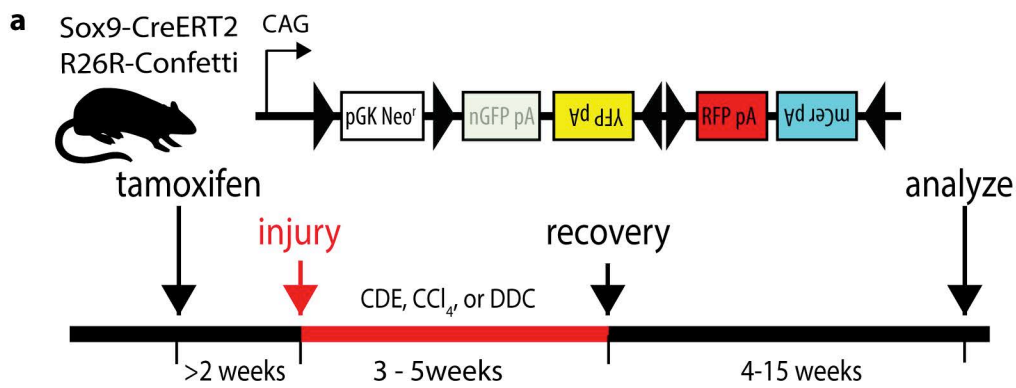**b** CDE: 4 weeks recovery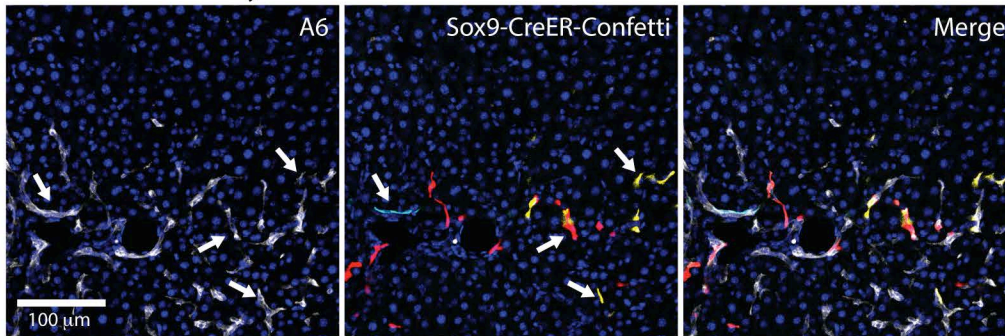**c** CCI4: 4 weeks recovery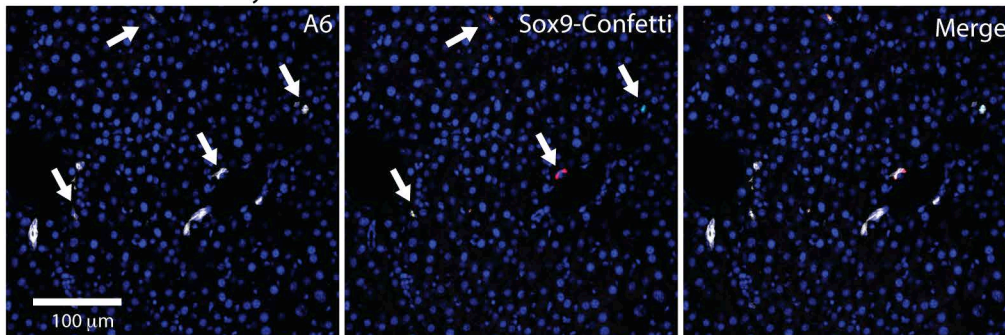**d** DDC: 5 weeks recovery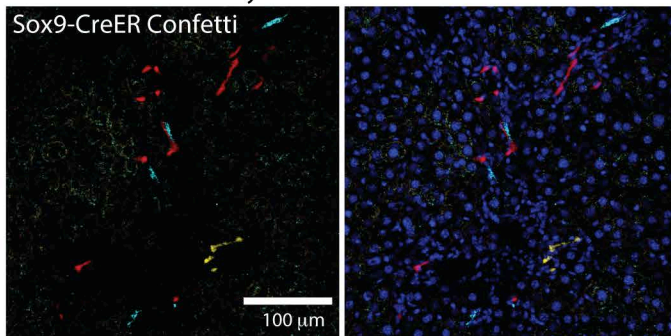

15 weeks recovery

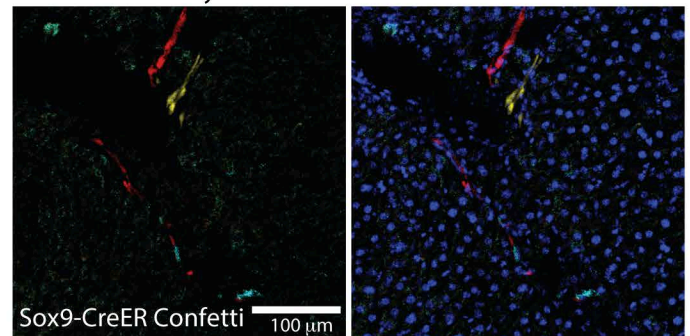

a

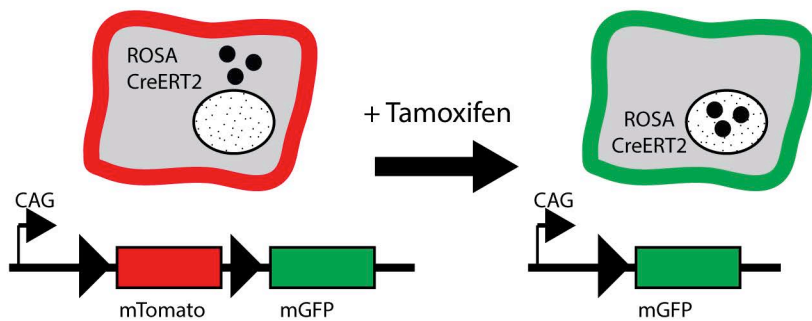

b

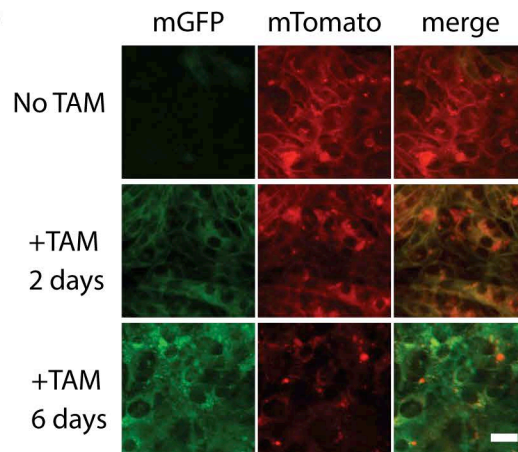

c

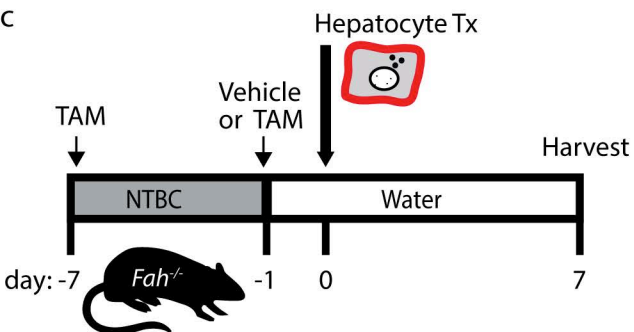

d

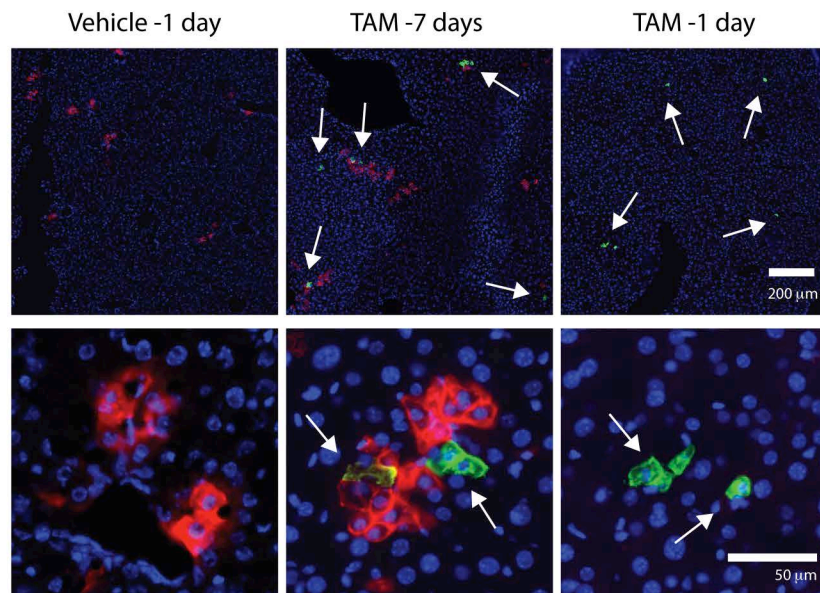

e

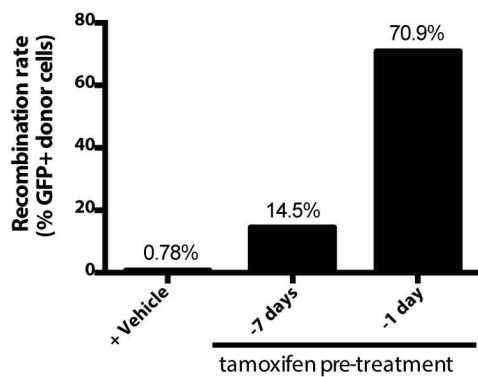

**a** 6 mo chow, 32mg/kg tam.

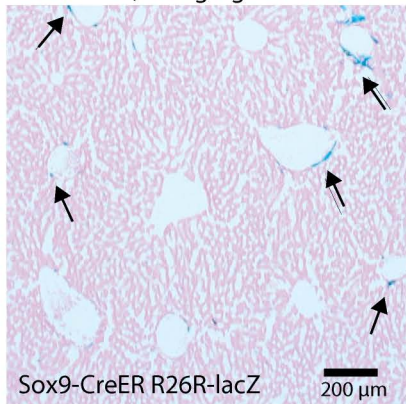

**b** 6 mo chow, 125mg/kg tam.

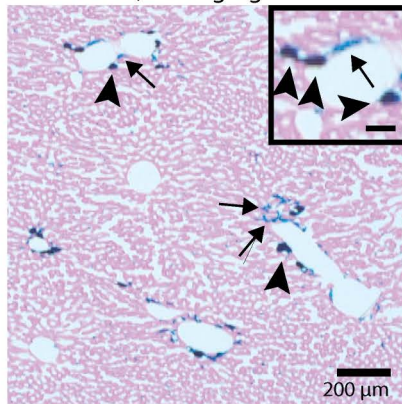

**c** 3 months, 125mg/kg tamoxifen, Sox9-CreER R26R-Confetti

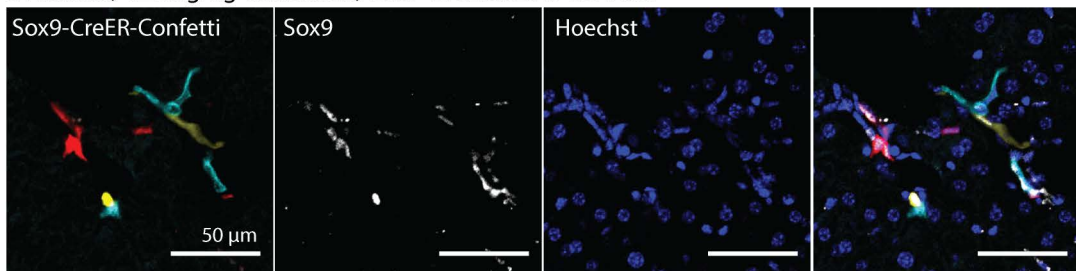

**d** 3 months, 125mg/kg tamoxifen, Sox9-CreER R26R-Confetti

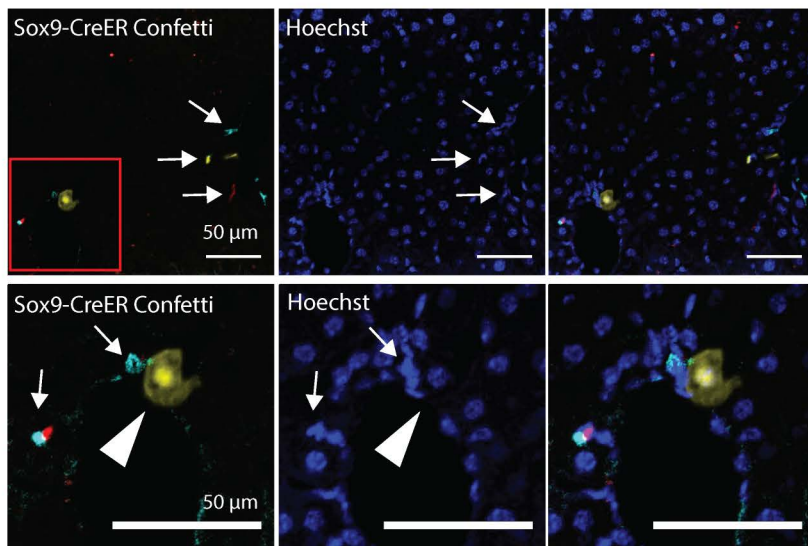

Supplemental Figure 3: FACS-based analysis of chimeric and Sox9-CreER marked liver cells

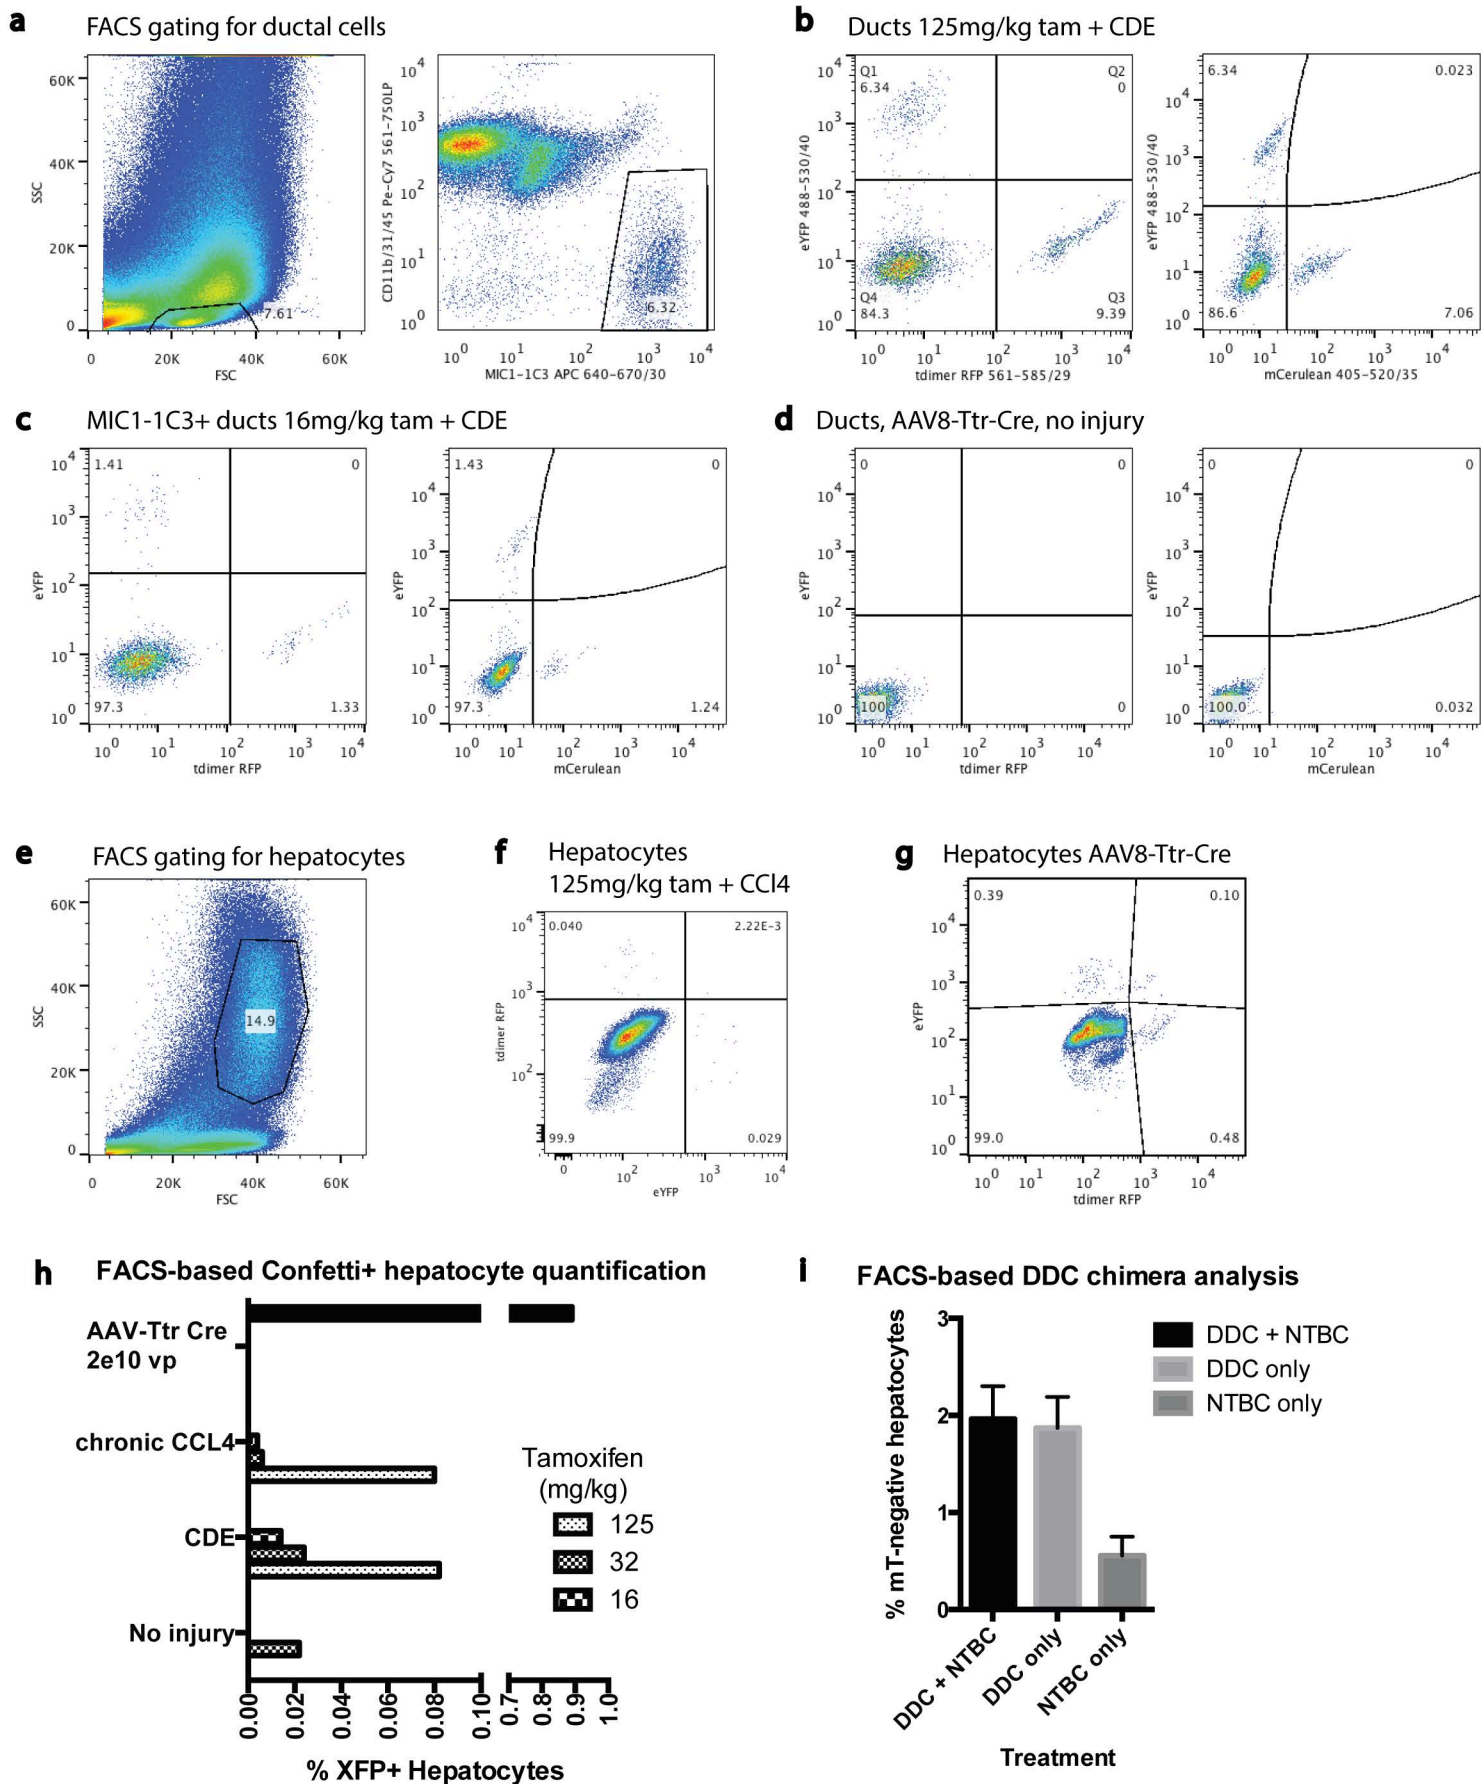

**a** Sox9-CreER R26R-Confetti  
YFP+ MIC1-1C3+ (32mg/kg)

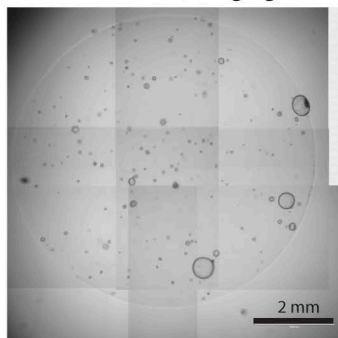

**b** Sox9-CreER R26R-Confetti  
YFP+ MIC1-1C3+ (250mg/kg)

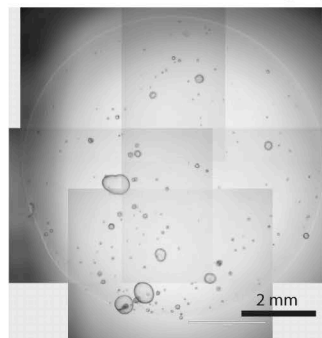

**c**

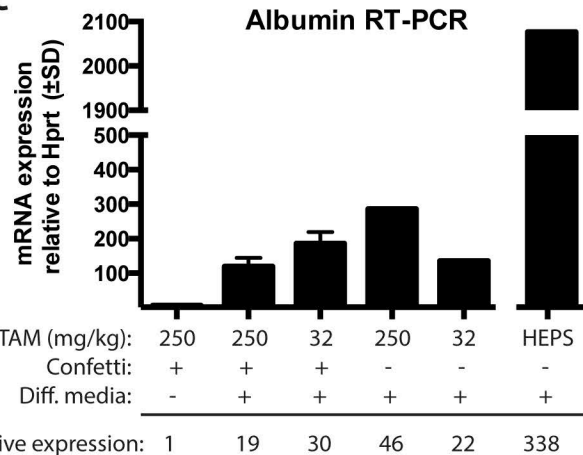

**d**

Sox9-CreER R26R-Confetti  
CDE treated, 32mg/kg, day 10

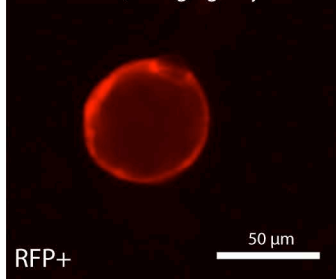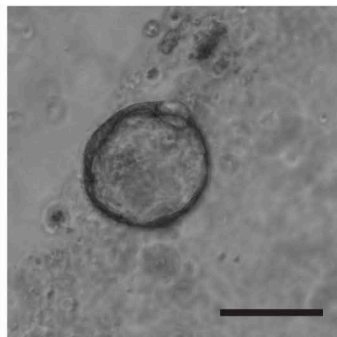

**e**

Sox9-CreER R26R-Confetti  
CCL4 treated, 32mg/kg, day 11

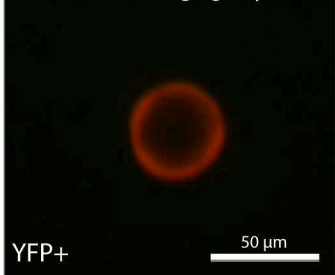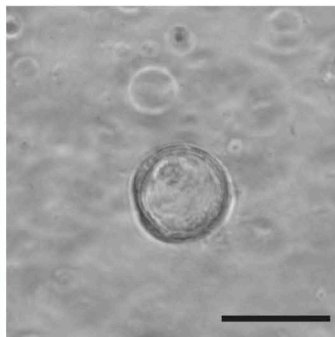

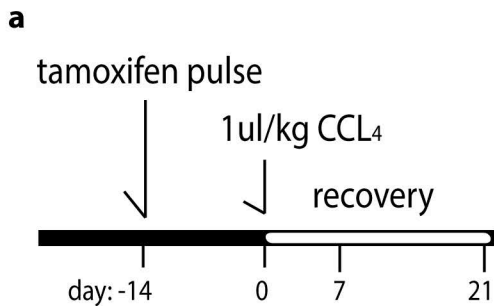

**b** Acute CCL4 regeneration

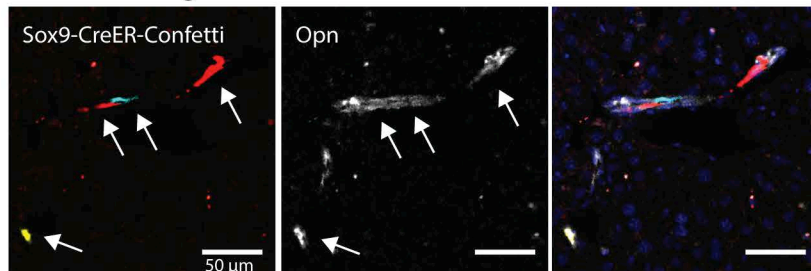

**c** Acute CCL4 regeneration (21d), rare hepatocyte clone

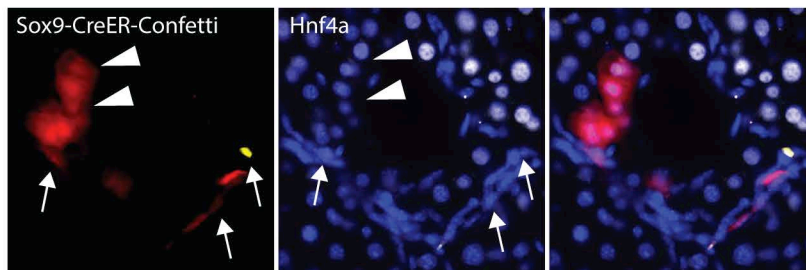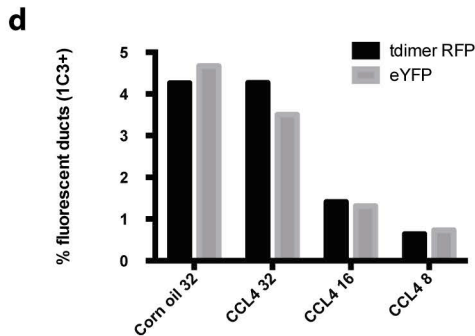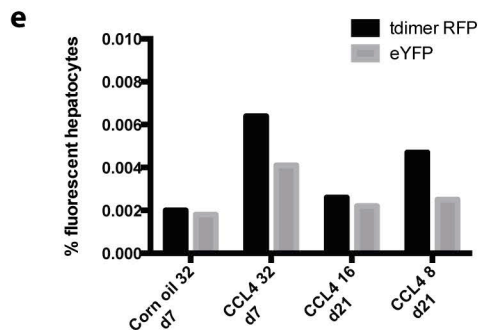

**a** Donor mT Fah A6 Hoechst  
6 week repopulation

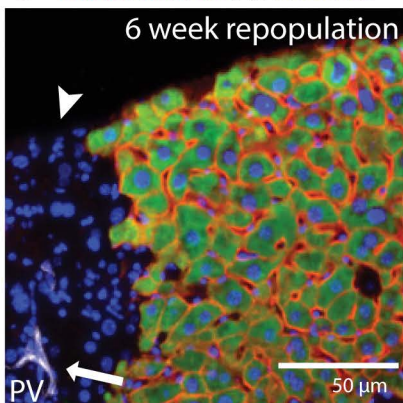

**b** Donor mT Hnf4a Hoechst  
10 week repopulation

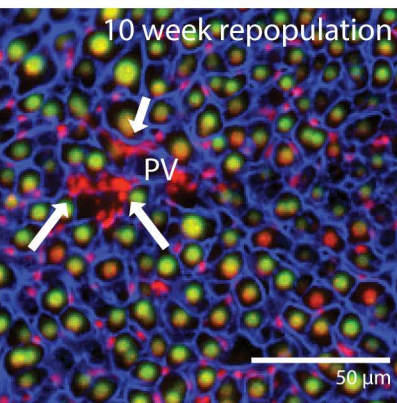

**c** Donor mT Cd31 Opn Hoechst  
10 week repopulation

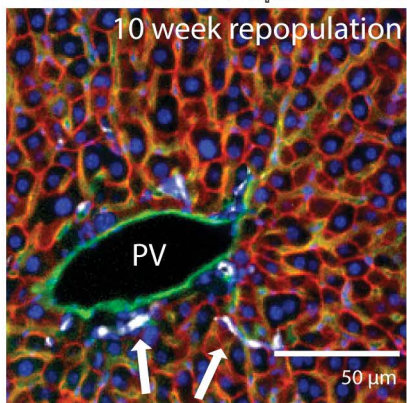

**d** Donor Cd11b Hoechst  
10 week repopulation

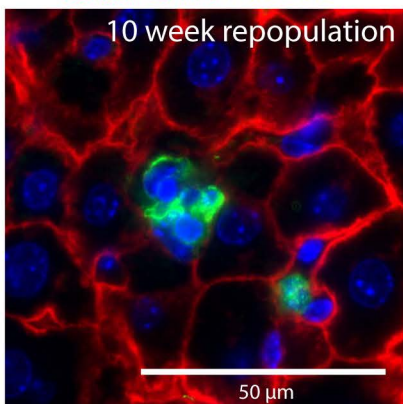

**e** Donor Gfap Hoechst  
10 week repopulation

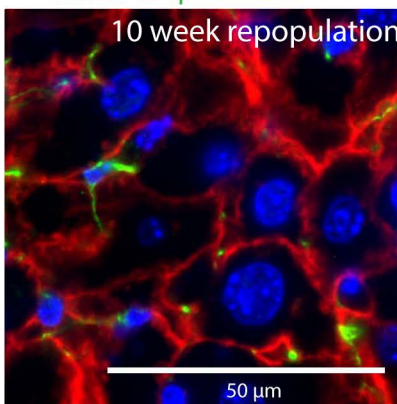

**f** Opn Fah/donor Hoechst  
10 week repopulation

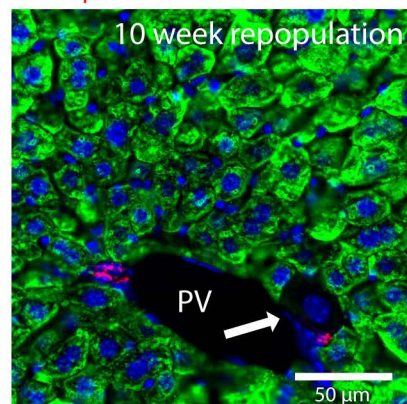

**g** mTomato Hepatocyte-Fah chimera, no injury

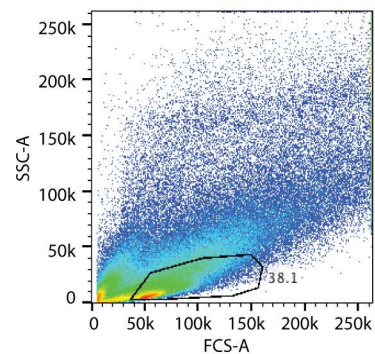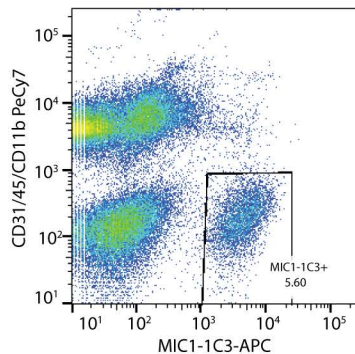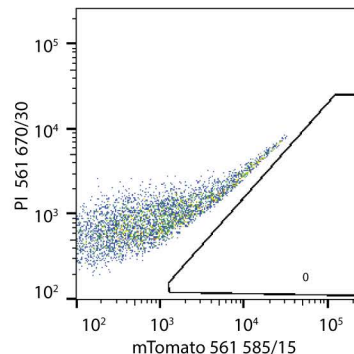



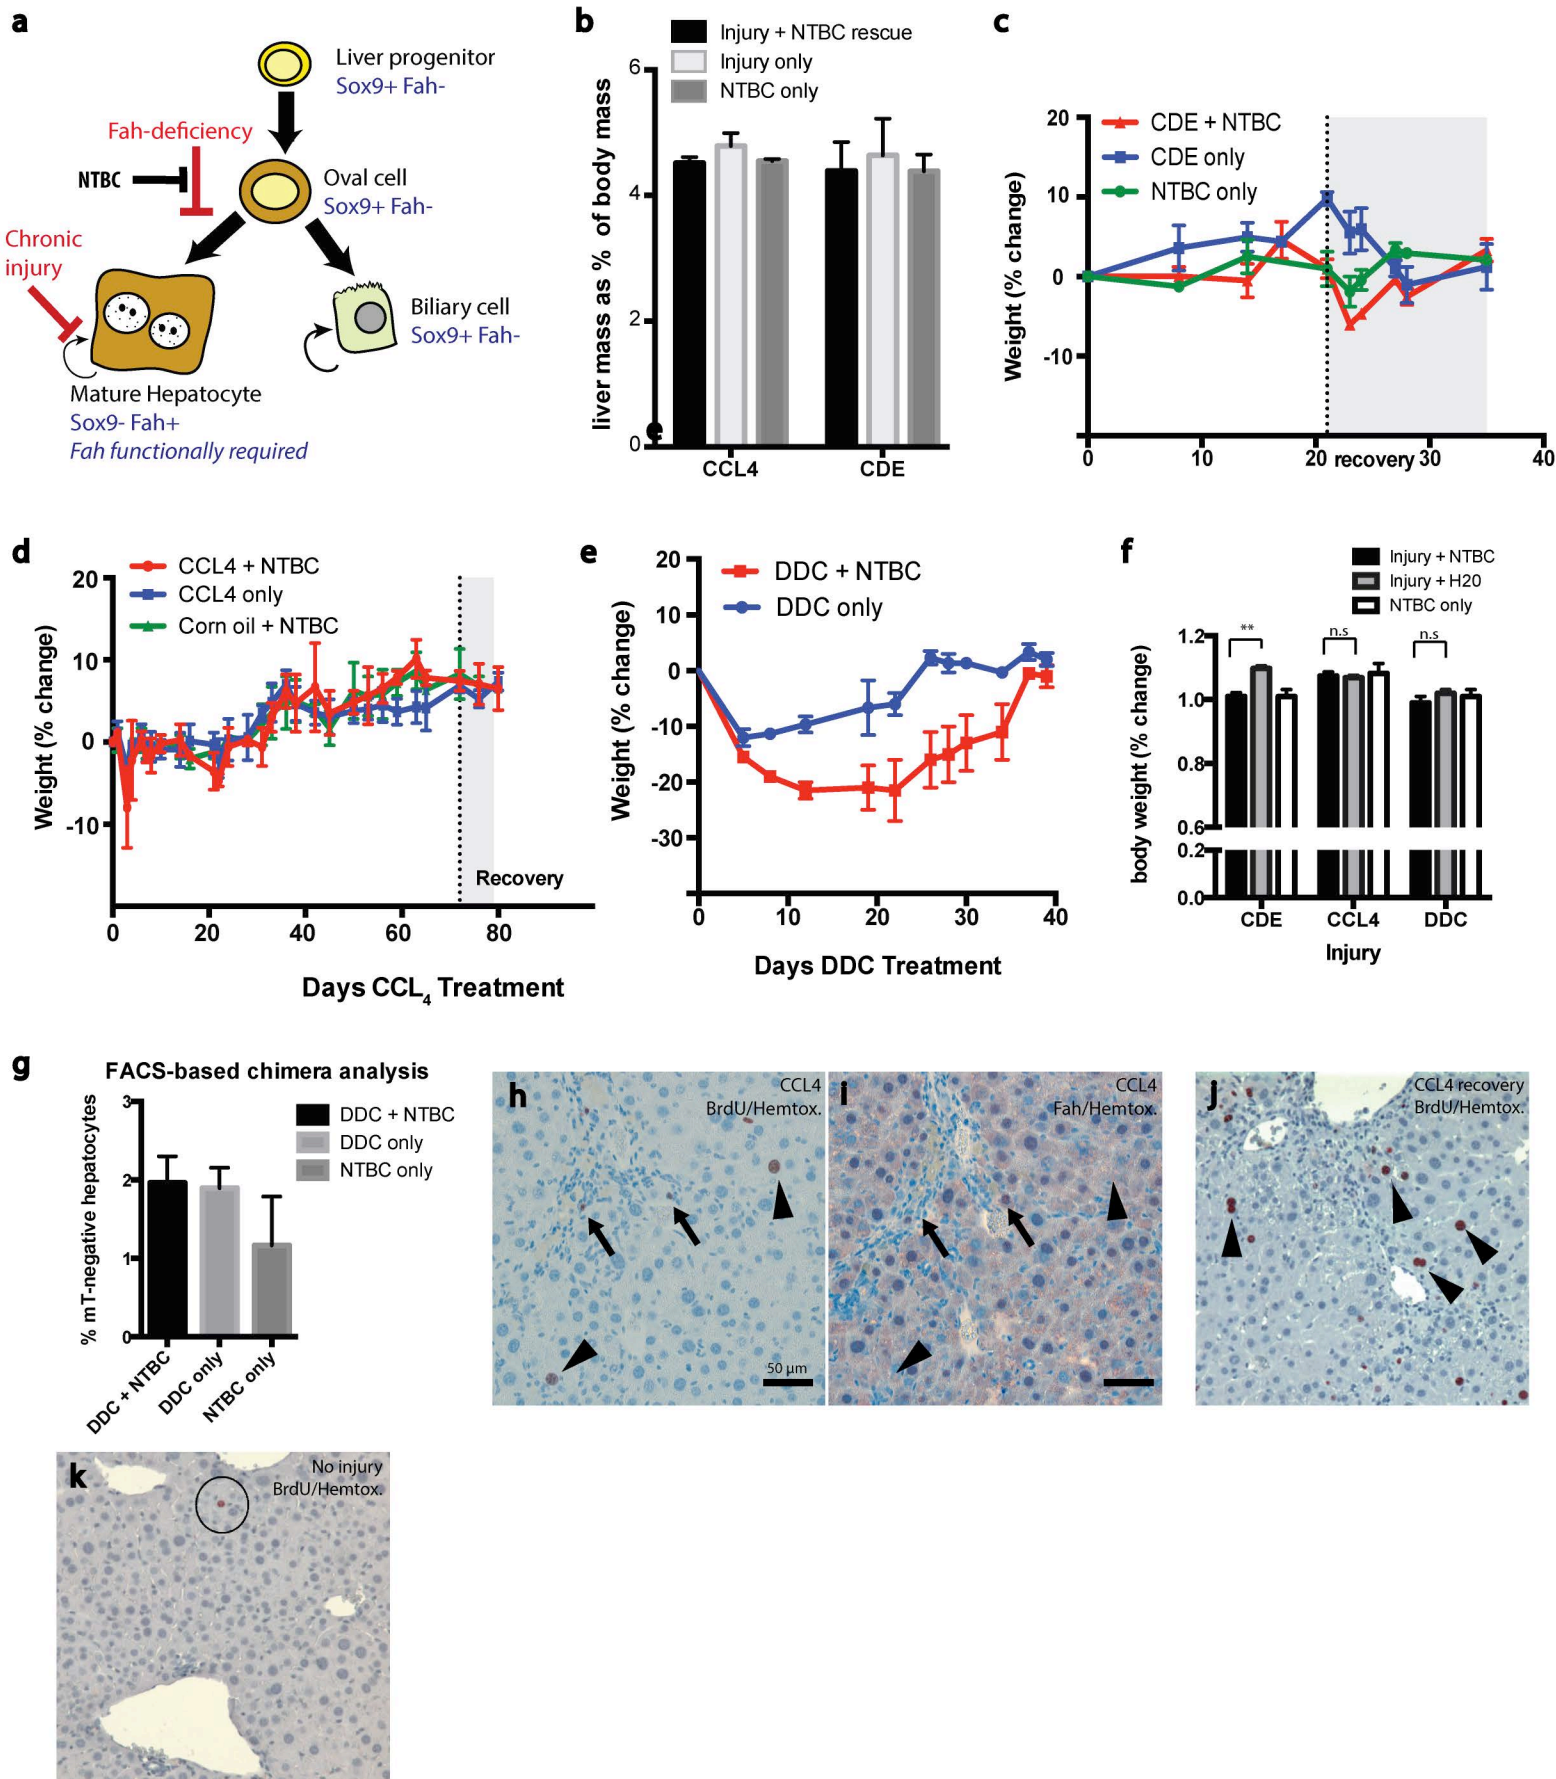

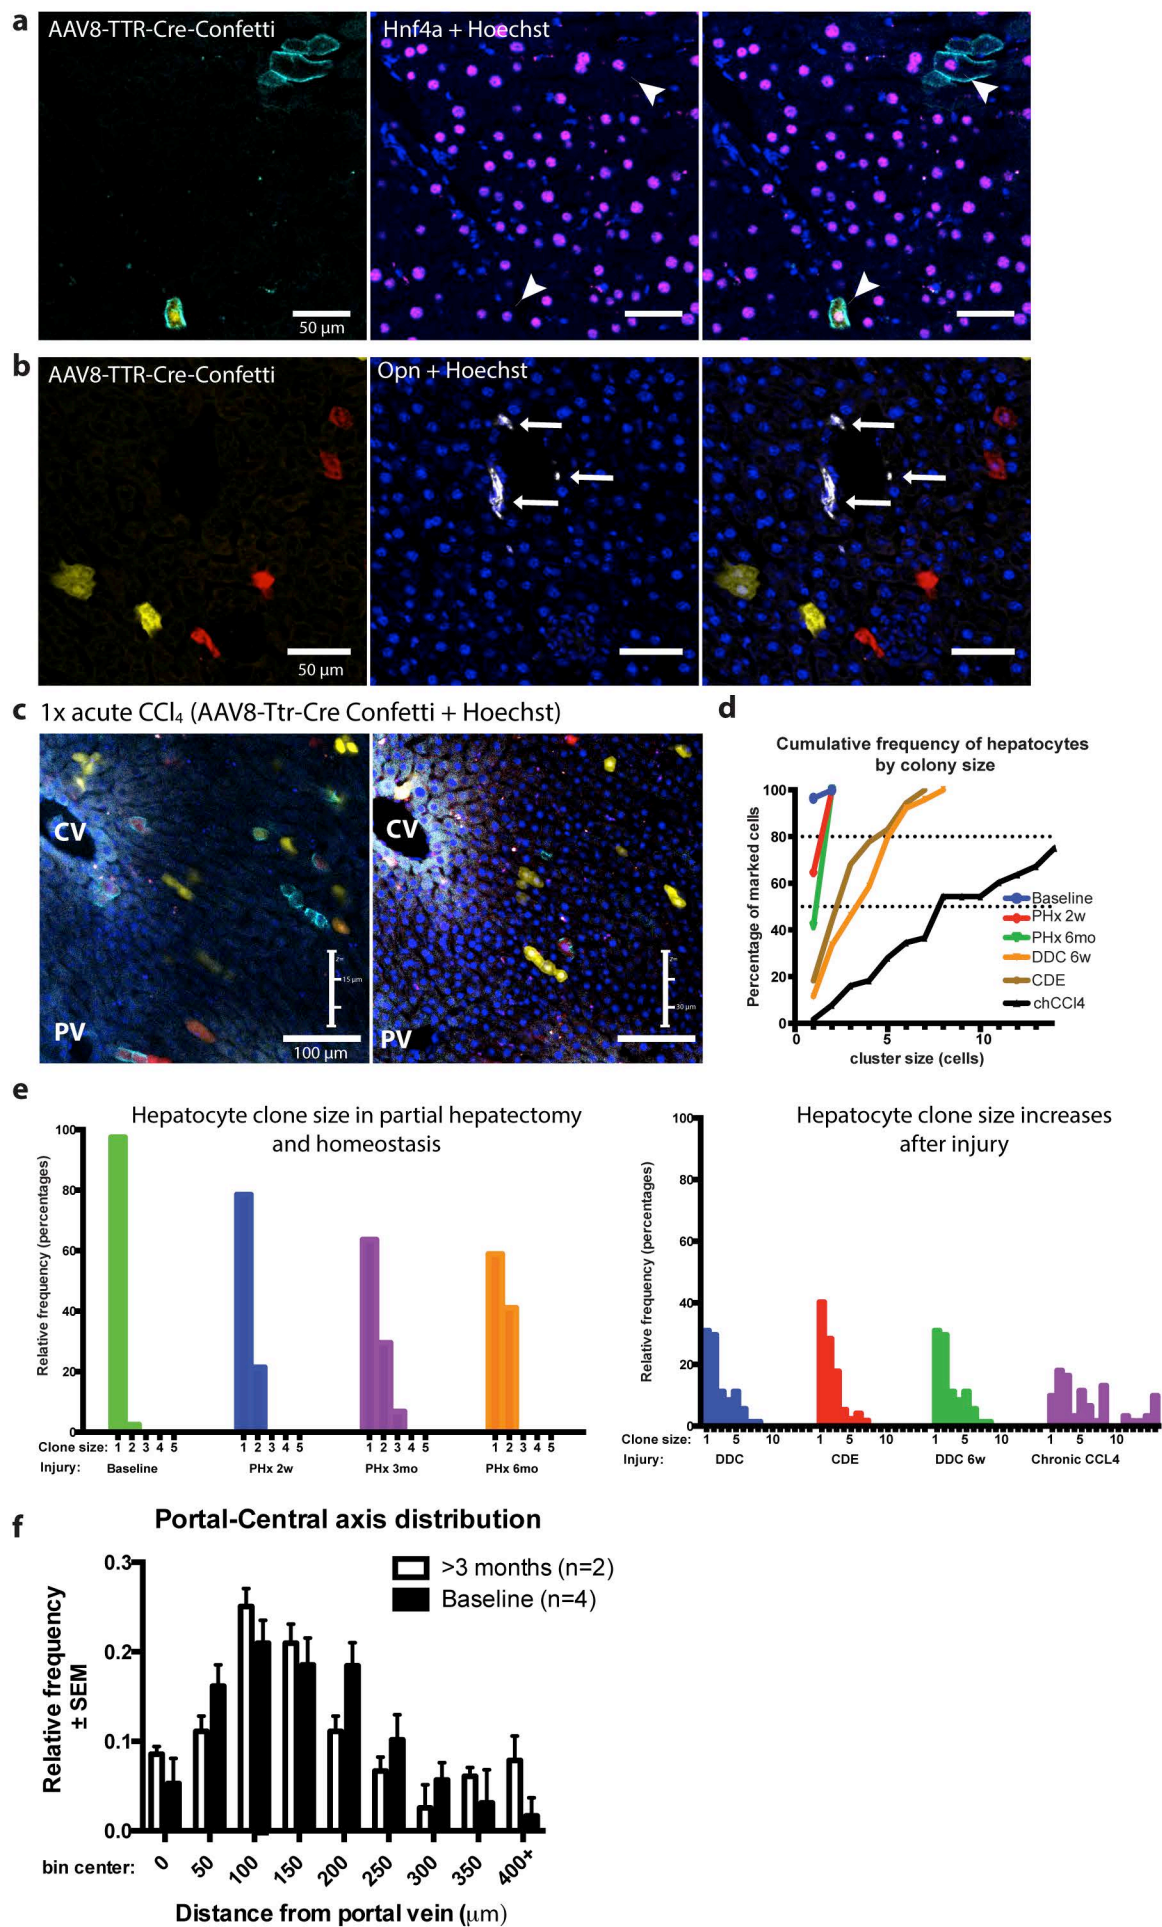

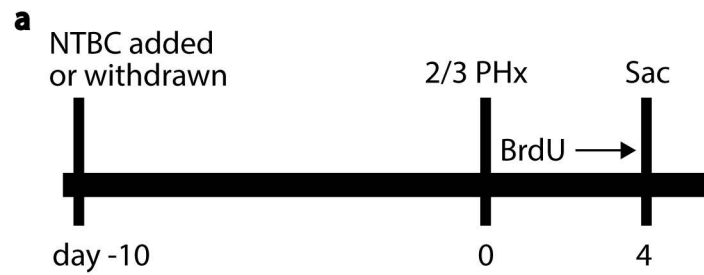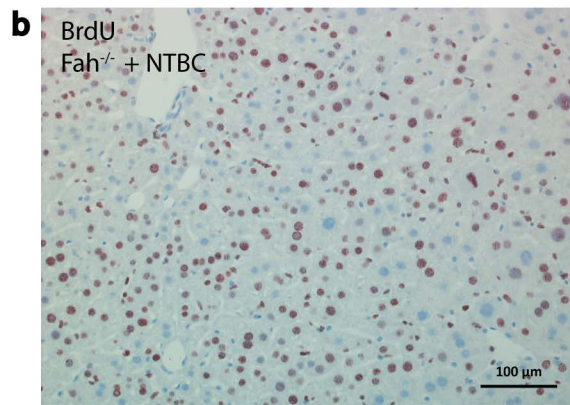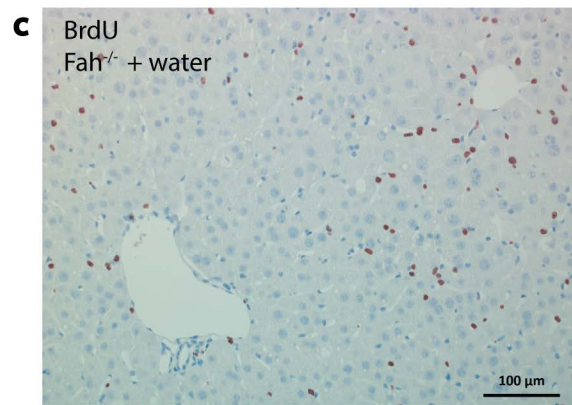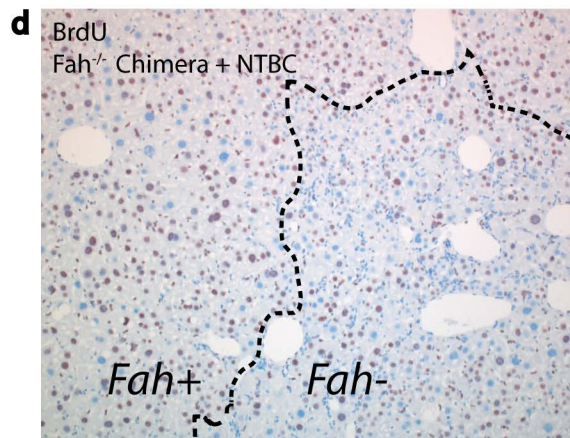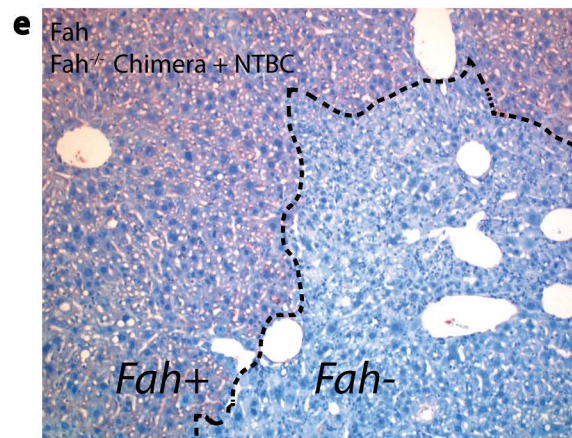

### *FACS sorting and analysis*

Hepatocytes and NPCs were isolated with a multiple-step collagenase dissociation and gravity centrifugation protocol as described previously(12). Cells were immunostained for FACS with antibodies listed in the supplementary table. PI was used as a cell viability indicator. Cells were analyzed and sorted with a Cytospeia inFluxV-GS equipped with 405, 488, 561, and 640nm excitation lasers.

### *Cell Counting and Image analysis*

Fluorescent and brightfield images were captured with Zeiss AxioImager.M2 with Xen Blue 2011 software and a computer controlled motorized stage (Zeiss Inc.). Images were analyzed and scored with ImageJ/FIJI ([www.fiji.sc](http://www.fiji.sc)). For analysis of injured chimeric liver tissue, sections were immunostained for Fah and nuclear counterstained with hemotoxylin or Hoechst 33258. mTomato direct fluorescence was also captured. Multiple high-resolution images were collected and the total numbers of positive and negative hepatocytes were scored from multiple liver lobes and sections from each animal.

For clonal AAV8-Ttr-Cre analysis in the R26R-Confetti mouse, direct fluorescence from fluorescent proteins was collected on a LSM780 laser scanning confocal microscope. Stitched z-stack images were collected and colony size was scored from a single 6um optical plane in all treatment groups for consistency. The thin section is may underestimate of hepatocyte cluster size. For hepatocyte clonal analysis, single clones were defined as cells of an identical color combination that were in direct contact with each other.

To evaluate the position of AAV8-Ttr-Cre-marked hepatocytes on the portal-central axis liver, 20µm thick fixed-frozen sections were first immunostained for osteopontin (AF647) and counterstained with Hoeschst 33258 to identify portal tracts. Multiple immunofluorescent images were collected from RFP, Opn-647, and Hoeschst channels using a Zeiss Apotome upright microscope outfitted with a (Xen Blue 2011, Carl Zeiss Inc). Images from adjacent fields were stitched together (ImageJ) to approximately 3300 x 2500 micron dimensions. Pixels were converted to micron measurements based on established calibration (1.550px/micron). The distance from the center of the marked cell to the nearest portal vein was measured for each Cre-marked clone (ImageJ).

For Sox9-CreER lineage tracing, 3-color direct fluorescence was collected from 50-100µm thick sections or 10µm sections co-labeled with a ductal marker (Opn or A6/AF647). After injury clones were scored as single color ductal cells that were at least 5 cells away from another marked cell of the same color.

#### *Assumptions for clonal marking*

Based on FACS based analysis of Sox9-CreER R26R-confetti<sup>+/-</sup> mice treated with 32mg/kg tamoxifen we assumed that 3% cholangiocytes were marked with mCerulean, eYFP, or tdimer-RFP. We did not observe double positive Sox9<sup>+</sup> cells when tamoxifen was allowed to washout. We assumed that 20 cholangiocytes were present at each portal triad in a single section in a normal liver at the time of marking. Given our assumptions, we calculated there was greater than an 88% chance that single color cell in a portal triad represented a distinct clone. For hepatocyte clonal analysis, single clones were defined as cells of an identical color that were in direct contact with each other.

### *Extended tamoxifen recombination*

Adult male *Fah*<sup>-/-</sup> mice were given IP tamoxifen 100mg/kg (dissolved in sesame oil) 7 days or 24 hours prior to intrasplenic hepatocyte transplantation. Sesame oil vehicle was given 24 hours prior. *Fah*<sup>-/-</sup> mice were maintained on 8mg/L NTBC water until 24 hours prior to transplant when NTBC was permanently discontinued. Then, hepatocytes were isolated from a *ROSA*<sup>-CreERT2/mTmG</sup> mouse (1,2) by standard collagenase perfusion and gravity centrifugation. The donor mouse also harbored a Scx-GFP (cytoplasmic) transgene that is not expressed in the liver(3). Donor cells were directly injected into the spleen of pre-treated recipient *Fah*<sup>-/-</sup> mice. Transplanted mice were sacrificed after 7 days and livers, fixed in 4% paraformaldehyde for 3 hours, cryopreserved in 30% sucrose, and frozen in OCT. 8 μm frozen sections were counterstained with Hoechst 33342 and analyzed on a fluorescent microscope.

For in vitro experiments, cells were plated in DMEM/F12 supplemented with 10% FBS, pen/strep, and 10mM HEPES. After cell attachment, tamoxifen citrate (dissolve in ethanol) was added to media overnight at a final concentration of 400nM. Media was then replaced every 2 days thereafter. Cells were imaged 2 or 6 days after tamoxifen administration on a fluorescent microscope (Evos, Life Technologies) and images were identically processed with ImageJ.

### *Statistical analysis*

Image quantification graphs and statistical tests results were generated with Prism 6.0b (Graphpad Software, Inc, La Jolla, CA, including histograms, bar graphs, standard error and confidence intervals, and unpaired parametric t-test).

### Supplementary Table 1 - Antibodies for FACS and IF/IHC

| Antibody /Antigen | Species    | Dilution factor | Use      | Product    | Source                 |
|-------------------|------------|-----------------|----------|------------|------------------------|
| MIC1-1C3          | Rat mAB    | 100             | FACS     | NBP1-18961 | Novus Biologics        |
| OC2-2F8           | Rat mAB    | 20              | FACS     | Gift       | Craig Dorrell, OHSU    |
| Cd31              | Rat mAB    | 100             | FACS     | 561410     | BD Biosciences         |
| Cd45              | Rat mAB    | 100             | FACS, IF | 552848     | BD Biosciences         |
| Cd11b             | Rat mAB    | 100             | FACS, IF | 552850     | BD Biosciences         |
| Fah               | Rabbit pAB | 500             | IF/IHC   | Custom     | Grompe Lab             |
| Brdu              | Rat mAB    | 50-250          | IF/IHC   | ab6326     | Abcam                  |
| Osteopontin       | Goat pAB   | 100             | IF       | AF808      | R&D systems            |
| A6                | Rat mAB    | 50              | IF       | Gift       | Valentina Factor, NCI  |
| Ck19              | Rabbit pAB | 500             | IF       | Gift       | Xin Wang, U. Minnesota |
| Sox9              | Rabbit pAB | 500             | IF       | AB5535     | Millipore, Inc         |
| Hnf4a             | Rabbit pAB | 100             | IF       | sc-8987    | Santa Cruz Bio         |

### Supplementary Table 2 - Transgenic mice in study

| Short name    | Scientific name                                                | Jax Stock # | Reference        |
|---------------|----------------------------------------------------------------|-------------|------------------|
| ROSA-lacZ     | B6.129S7- <i>Gt(ROSA)26Sor</i> /J                              | 002192      | Friedrich G 1991 |
| R26R-lacZ     | B6.129S4- <i>Gt(ROSA)26Sortm1Sor</i> /J                        | 003474      | Soriano P, 1999  |
| ROSA-mTomato  | B6.129(Cg)- <i>Gt(ROSA)26Sortm4(ACTB-tdTomato,-EGFP)Luo</i> /J | 007676      | Muzumdar M, 2007 |
| R26R-Confetti | B6.Cg- <i>Gt(ROSA)26Sortm1(CAG-Brainbow2.1)Cle</i> /J          | 017492      | Snippert H, 2010 |
| Sox9-CreERT2  | Tg( <i>Sox9-cre/ERT2</i> )1Msan/J                              | 018829      | Kopp J, 2011     |
| Fah-/-        | Fah tm1Mgo                                                     | N/A         | Grompe M, 1993   |
| ROSA-CreERT2  | <i>Gt(ROSA)26Sortm2(cre/ERT2)Brn</i>                           | N/A         | Hameyer D, 2007  |

### **Supplementary references:**

1. Muzumdar MD, Tasic B, Miyamichi K, Li L, Luo L. A global double-fluorescent Cre reporter mouse. *Genesis*. 2007;45:593–605.
2. Hameyer D, Loonstra A, Eshkind L, Schmitt S, Antunes C, Groen A, et al. Toxicity of ligand-dependent Cre recombinases and generation of a conditional Cre deleter mouse allowing mosaic recombination in peripheral tissues. *Physiological Genomics*. 2007;31:32–41.
3. Pryce BA, Brent AE, Murchison ND, Tabin CJ, Schweitzer R. Generation of transgenic tendon reporters, ScxGFP and ScxAP, using regulatory elements of the scleraxis gene. *Dev. Dyn*. 2007;236:1677–1682.
